# Supplementary material
Source: publisher figshare collection journal article supplement (https://aacr.figshare.com/articles/dataset/_/22366557)
Supplement: Supplementary file 1 [file 39811599]

## Supplementary Figure S1

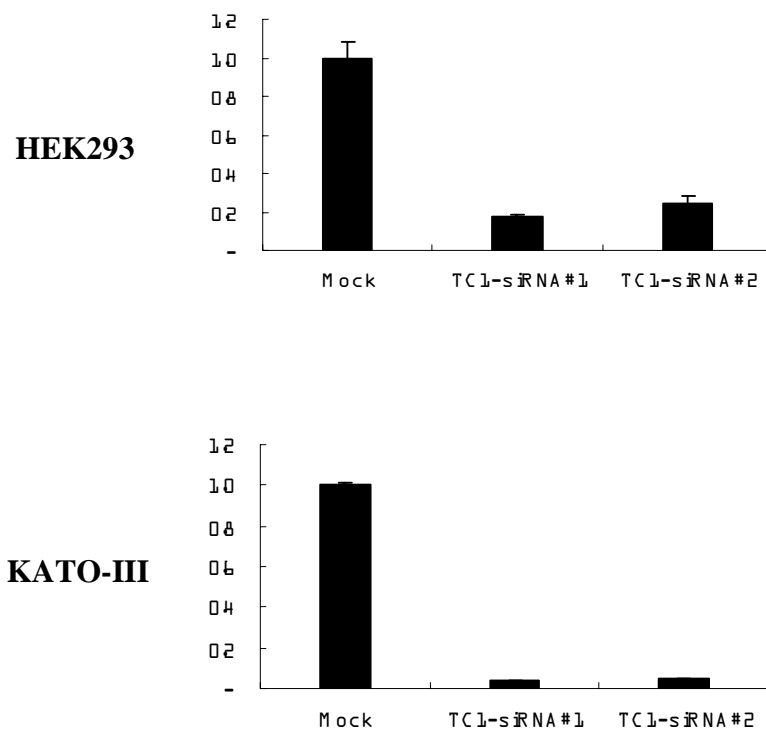

TC1-knockdown by 2 TC1-siRNAs. The TC1 expression was measured in triplicate using real-time PCR at 48 hours following transfection of siRNA #1 or #2 in HEK293 and KATO-III cells. For real-time PCR analysis, TaqMan® Gene Expression Assay (Hs00535539\_s1) was applied using TaqMan MGB probe (6-FAM dye-labeled), 5'-CCACTTCGACACAGCCTCTCGTAAG-3' (Applied Biosystems, Foster City, CA). Measurements were done in triplicate using human  $\beta$ -actin gene as endogenous control.
